# Supplementary material for: Hyperactivated Wnt Signaling Induces Synthetic Lethal Interaction with Rb Inactivation by Elevating TORC1 Activities
Source: PubMed Central journal article supplement (PMC4014429; doi:10.1371/journal.pgen.1004357), 2014-05-08
Supplement: pgen.1004357.s006.pdf [file pgen.1004357.s006.pdf]

## Supplemental Table S1

| Go term                                                                  | P-Value  |
|--------------------------------------------------------------------------|----------|
| downregulated in axn-127 mutant                                          |          |
| <b>metabolism</b>                                                        |          |
| <a href="#">GO:0044710 single-organism metabolic process</a>             | 2.87E-15 |
| <a href="#">GO:0008152 metabolic process</a>                             | 2.56E-12 |
| <a href="#">GO:0005975 carbohydrate metabolic process</a>                | 5.69E-06 |
| <a href="#">GO:0006629 lipid metabolic process</a>                       | 6.10E-06 |
| <b>oxidation-reduction</b>                                               |          |
| <a href="#">GO:0055114 oxidation-reduction process</a>                   | 1.47E-09 |
| upregulated in axn-127 mutant                                            |          |
| <b>morphogenesis, development and differentiation</b>                    |          |
| <a href="#">GO:0035107 appendage morphogenesis</a>                       | 3.40E-09 |
| <a href="#">GO:0048736 appendage development</a>                         | 5.80E-09 |
| <a href="#">GO:0048563 post-embryonic organ morphogenesis</a>            | 9.53E-09 |
| <a href="#">GO:0007560 imaginal disc morphogenesis</a>                   | 9.53E-09 |
| <a href="#">GO:0007476 imaginal disc-derived wing morphogenesis</a>      | 9.97E-09 |
| <a href="#">GO:0048569 post-embryonic organ development</a>              | 9.98E-09 |
| <a href="#">GO:0035220 wing disc development</a>                         | 1.13E-08 |
| <a href="#">GO:0035120 post-embryonic appendage morphogenesis</a>        | 1.33E-08 |
| <a href="#">GO:0035114 imaginal disc-derived appendage morphogenesis</a> | 1.63E-08 |
| <a href="#">GO:0007472 wing disc morphogenesis</a>                       | 2.33E-08 |
| <a href="#">GO:0048737 imaginal disc-derived appendage development</a>   | 2.74E-08 |
| <a href="#">GO:0007444 imaginal disc development</a>                     | 3.70E-08 |
| <a href="#">GO:0006928 cellular component movement</a>                   | 4.20E-08 |
| <a href="#">GO:0048707 instar larval or pupal morphogenesis</a>          | 4.77E-08 |
| <a href="#">GO:0009886 post-embryonic morphogenesis</a>                  | 6.64E-08 |
| <a href="#">GO:0009791 post-embryonic development</a>                    | 7.87E-08 |
| <a href="#">GO:0002165 instar larval or pupal development</a>            | 1.27E-07 |
| <a href="#">GO:0000902 cell morphogenesis</a>                            | 3.11E-07 |
| <a href="#">GO:0010646 regulation of cell communication</a>              | 5.51E-07 |
| <a href="#">GO:0007552 metamorphosis</a>                                 | 7.06E-07 |
| <a href="#">GO:0050793 regulation of developmental process</a>           | 1.33E-06 |
| <a href="#">GO:0050794 regulation of cellular process</a>                | 4.55E-06 |
| <a href="#">GO:0007283 spermatogenesis</a>                               | 1.87E-05 |
| <a href="#">GO:0048232 male gamete generation</a>                        | 2.15E-05 |
| <a href="#">GO:0032989 cellular component morphogenesis</a>              | 2.33E-05 |

|                                                                      |          |
|----------------------------------------------------------------------|----------|
| <a href="#">GO:0048468 cell development</a>                          | 2.45E-05 |
| <a href="#">GO:0010648 negative regulation of cell communication</a> | 3.22E-05 |

**signaling pathways**

|                                                                       |          |
|-----------------------------------------------------------------------|----------|
| <a href="#">GO:0023051 regulation of signaling</a>                    | 2.28E-07 |
| <a href="#">GO:0009966 regulation of signal transduction</a>          | 5.34E-07 |
| <a href="#">GO:0009968 negative regulation of signal transduction</a> | 7.38E-06 |

**response to stimulus or stress**

|                                                                        |          |
|------------------------------------------------------------------------|----------|
| <a href="#">GO:0048585 negative regulation of response to stimulus</a> | 3.59E-05 |
| <a href="#">GO:0048583 regulation of response to stimulus</a>          | 3.90E-05 |

**other**

|                                                             |          |
|-------------------------------------------------------------|----------|
| <a href="#">GO:0050789 regulation of biological process</a> | 4.69E-05 |
| <a href="#">GO:0044763 single-organism cellular process</a> | 5.51E-05 |
