# Supplementary material for: Hyperactivated Wnt Signaling Induces Synthetic Lethal Interaction with Rb Inactivation by Elevating TORC1 Activities
Source: PubMed Central journal article supplement (PMC4014429; doi:10.1371/journal.pgen.1004357), 2014-05-08
Supplement: pgen.1004357.s007.pdf [file pgen.1004357.s007.pdf]

## Supplemental Table S2

genes downregulated in 127

CG32280  
1-Sep  
Aats-glupro  
Aats-gly  
Aats-pro  
abd-A  
abo  
Acon  
Acp65Aa  
Ada  
ade5  
Adgf-C  
Adh /// Adhr  
adp  
Ady43A  
Ag5r2  
Ahcy13  
Ahcy89E  
Alg10  
alpha4GT1  
alpha-Cat  
alpha-Est4  
alpha-Est9  
alphaTub85E  
Aly  
Amy-d /// Amy-p  
ana  
Ance-4  
Ance-5  
angel  
anon-67Ea /// hay  
Aos1  
Aph-4  
Aplip1  
AR-2  
aralar1  
Arc42  
Ard1 /// CG42455  
aret  
arg  
Ark  
Arp11  
Arpc3A  
Arr1

genes upregulated in 127

2mit  
5-HT7  
Abl  
achi /// vis  
acj6  
Acp95EF  
Acsi  
Actbeta  
Actn3  
ACXA  
ACXC  
Adar  
AGO1  
alc  
alph  
alphaTub84D /// Tm1  
amon  
Amun  
And /// CG17770  
Apc2  
app  
apt  
Arc1  
CG10102  
aret  
ari-1  
Arp14D  
Asph  
Atac1  
Atg8b  
Atpalpha  
AttA  
AttB  
AttC  
B4  
B52  
bam  
bbg  
be  
beat-IIIa /// CG34106  
bel  
betaInt-nu  
bgm  
BicC

|                       |         |
|-----------------------|---------|
| asparagine-synthetase | bl      |
| Asph                  | Bmcp    |
| Ast                   | bnl     |
| Atg7                  | bol     |
| Atg9                  | br      |
| ATPsyn-b              | brat    |
| ATPsyn-beta           | brp     |
| ATPsyn-d              | BthD    |
| ATPsyn-gamma          | Btk29A  |
| att-ORFA /// att-ORFB | btsz    |
| Atx-1 /// CG4542      | bun     |
| Awh                   | bur     |
| Axn                   | bves    |
| b                     | Bx      |
| B4                    | by      |
| B52                   | C3G     |
| ball                  | ca      |
| bap                   | cal1    |
| beg                   | CalpB   |
| beta3GalTII           | Calx    |
| beta4GalNAcTB         | Camta   |
| betaCop               | can     |
| betaggt-II            | Caps    |
| betaTry               | capu    |
| BG4                   | cas     |
| Bgb                   | Cby     |
| bib                   | CCS     |
| Bin1                  | Cct2    |
| Bka                   | Cda5    |
| BM-40-SPARC           | Cdc6    |
| Brd8                  | Cdep    |
| Brf                   | Cdlc2   |
| bsf                   | CecC    |
| BtbVII                | cenG1A  |
| Btd                   | CG10039 |
| Bub3                  | CG10055 |
| bys                   | CG10062 |
| C1GalTA               | CG10063 |
| Cad86C                | CG10068 |
| cag                   | CG10073 |
| CAH1                  | CG10086 |
| CAH2                  | CG10089 |
| CalpA                 | CG10202 |
| CanA1                 | CG10249 |
| CanB                  | CG10298 |
| Catsup                | CG10300 |
| cbt                   | CG10307 |

|                         |         |
|-------------------------|---------|
| Ccp84Ac                 | CG10317 |
| Ccp84Ae                 | CG10320 |
| Ccp84Af                 | CG10337 |
| CDase                   | CG10383 |
| Cdep                    | CG10396 |
| Cenp-C                  | CG10433 |
| CG10006                 | CG10494 |
| CG10026                 | CG10508 |
| CG10031                 | CG10543 |
| CG10131                 | CG10588 |
| CG10153                 | CG10650 |
| CG10178                 | CG10694 |
| CG10189                 | CG10734 |
| CG10195                 | CG10752 |
| CG10209                 | CG10761 |
| CG10214                 | CG10777 |
| CG10237                 | CG10793 |
| CG10311                 | CG10809 |
| CG10347                 | CG10834 |
| CG1041                  | CG10841 |
| CG10418                 | CG10859 |
| CG10424                 | CG10869 |
| CG10444                 | CG10880 |
| CG10467                 | CG10899 |
| CG10469                 | CG10910 |
| CG10476 /// CG18606     | CG10911 |
| CG10477                 | CG10912 |
| CG10512                 | CG10918 |
| CG10513                 | CG10919 |
| CG10514                 | CG10920 |
| CG10566                 | CG10934 |
| CG10623                 | CG10943 |
| CG10628                 | CG10969 |
| CG10638                 | CG10970 |
| CG10639                 | CG11023 |
| CG10646                 | CG11030 |
| CG10681                 | CG11042 |
| CG10754                 | CG11043 |
| CG10764                 | CG11050 |
| CG10795                 | CG11052 |
| CG10799                 | CG11068 |
| CG10824 /// DsimGD20003 | CG11093 |
| CG10825                 | CG11106 |
| CG10827                 | CG11125 |
| CG10904                 | CG11138 |
| CG10927                 | CG11165 |
| CG10933                 | CG30378 |

|                         |                         |
|-------------------------|-------------------------|
| CG11029                 | CG11226                 |
| CG1103                  | CG11262                 |
| CG11073                 | CG11291                 |
| CG11077                 | CG11298                 |
| CG11095                 | CG11322                 |
| CG11110                 | CG11327                 |
| CG11123 /// DmirCG11123 | CG11360                 |
| CG11127                 | CG11362                 |
| CG11131                 | CG1137                  |
| CG11134                 | CG11373                 |
| CG1115                  | CG11374                 |
| CG11151                 | CG11384                 |
| CG11170                 | CG11396                 |
| CG11210                 | CG11404                 |
| CG11257                 | CG11426                 |
| CG11284                 | CG11448                 |
| CG11300                 | CG1146                  |
| CG11313                 | CG11462                 |
| CG11345                 | CG11505                 |
| CG11349                 | CG11523                 |
| CG1136                  | CG11537                 |
| CG11377                 | CG11563                 |
| CG11382                 | CG11586                 |
| CG11388                 | CG11658                 |
| CG1139                  | CG11666                 |
| CG11425                 | CG11671                 |
| CG11438                 | CG11694                 |
| CG11444                 | CG11697                 |
| CG11459 /// DsimGD19566 | CG11698                 |
| CG11470                 | CG11703                 |
| CG11534                 | CG11796 /// DsecCG11796 |
| CG11539                 | CG11873                 |
| CG11576                 | CG11929                 |
| CG11594                 | CG11964                 |
| CG11601                 | CG11970                 |
| CG1161                  | CG12007                 |
| CG11638                 | CG12027                 |
| CG11652                 | CG12038                 |
| CG11668                 | CG12069                 |
| CG11679                 | CG12075                 |
| CG11695                 | CG12106                 |
| CG11696                 | CG12128                 |
| CG11710                 | CG12130 /// DpseGA11425 |
| CG11737                 | CG12147                 |
| CG11752                 | CG12179                 |
| CG11753                 | CG12184                 |
| CG11788                 | CG12201                 |

|                         |                       |
|-------------------------|-----------------------|
| CG11820                 | CG12206               |
| CG11835                 | CG12209               |
| CG11836                 | CG12229 /// CG14101   |
| CG11851                 | CG12236               |
| CG11875                 | CG12307               |
| CG11876                 | CG12309               |
| CG11882                 | CG12325               |
| CG11892                 | CG12355               |
| CG11911                 | CG12377               |
| CG11912 /// DsimCG11912 | CG12378               |
| CG11926                 | CG12395               |
| CG11975                 | CG12424               |
| CG12006                 | CG12432               |
| CG12009                 | CG12470               |
| CG12012                 | CG12479               |
| CG12018                 | CG12493               |
| CG12024                 | CG12498               |
| CG12056                 | CG12511               |
| CG12057                 | CG12521               |
| CG12082                 | CG12609               |
| CG12093                 | CG12617               |
| CG12096                 | CG12637               |
| CG12116 /// DsecCG12116 | CG12661               |
| CG12119                 | CG12684               |
| CG1213                  | CG12689               |
| CG12162                 | CG12699               |
| CG12170                 | CG12728               |
| CG12173                 | CG12730               |
| CG12203                 | CG12825               |
| CG12219                 | CG12853               |
| CG12253                 | CG12857               |
| CG12259                 | CG12858               |
| CG12264                 | CG12860               |
| CG12272                 | CG12861               |
| CG12279                 | CG12868               |
| CG1231                  | CG1288 /// DbuzCG1288 |
| CG12375                 | CG12902               |
| CG1239                  | CG12907               |
| CG12404                 | CG12945               |
| CG12413                 | CG12992               |
| CG12481                 | CG13008               |
| CG12508                 | CG13075               |
| CG12539                 | CG13078               |
| CG12746                 | CG13110               |
| CG12811                 | CG13168               |
| CG12877                 | CG1317                |
| CG12951                 | CG13202               |

|                         |                                         |
|-------------------------|-----------------------------------------|
| CG1299                  | CG1324                                  |
| CG13003                 | CG13243                                 |
| CG13004                 | CG13244                                 |
| CG13014                 | CG13245                                 |
| CG13033                 | CG13323                                 |
| CG13038                 | CG13324 /// DyakGE13403                 |
| CG13040                 | CG13337                                 |
| CG13041                 | CG13340 /// DmauCG13340 /// DsimGD25742 |
| CG13042                 | CG13344                                 |
| CG13043                 | CG13362                                 |
| CG13044                 | CG13385                                 |
| CG13046                 | CG1340                                  |
| CG13047                 | CG13405                                 |
| CG13059                 | CG13422 /// CG7655                      |
| CG13060                 | CG13424                                 |
| CG13063                 | CG13461                                 |
| CG13064                 | CG1347                                  |
| CG13066                 | CG13473                                 |
| CG13067                 | CG13476                                 |
| CG13068                 | CG13479                                 |
| CG13069                 | CG13488                                 |
| CG13101                 | CG13494                                 |
| CG13117                 | CG13506                                 |
| CG13175 /// CG33964     | CG13511                                 |
| CG13183 /// DsecCG13183 | CG13526                                 |
| CG13204                 | CG13538                                 |
| CG13220                 | CG13539                                 |
| CG13228                 | CG13540                                 |
| CG13231                 | CG13544                                 |
| CG13319                 | CG13564                                 |
| CG13349                 | CG13581                                 |
| CG13365                 | CG13597                                 |
| CG13392                 | CG13602                                 |
| CG13430 /// CG18065     | CG13604                                 |
| CG13516                 | CG13624                                 |
| CG1354                  | CG13693                                 |
| CG13545                 | CG13704                                 |
| CG13550                 | CG13723                                 |
| CG13641                 | CG13733                                 |
| CG13654                 | CG13745                                 |
| CG13676                 | CG13838                                 |
| CG13678                 | CG13841 /// CG4000                      |
| CG1368                  | CG13843                                 |
| CG13698                 | CG13871                                 |
| CG13700                 | CG13884                                 |
| CG13722                 | CG13898                                 |
| CG13731                 | CG1394                                  |

|                                         |                                         |
|-----------------------------------------|-----------------------------------------|
| CG13766                                 | CG1399                                  |
| CG13795 /// DsecCG13795                 | CG14000                                 |
| CG13796                                 | CG14022                                 |
| CG13833                                 | CG14023                                 |
| CG13857 /// DmauCG13857 /// DsimCG13857 | CG14042 /// SP555                       |
| CG13876                                 | CG1407                                  |
| CG13894                                 | CG14071                                 |
| CG13902                                 | CG14077 /// lr75d                       |
| CG13905                                 | CG1409                                  |
| CG13912                                 | CG14113                                 |
| CG13917                                 | CG14154                                 |
| CG13919                                 | CG14164 /// CG6709                      |
| CG13947                                 | CG14183                                 |
| CG13962                                 | CG14269                                 |
| CG13966                                 | CG14294                                 |
| CG14043                                 | CG14315                                 |
| CG14062                                 | CG14339 /// DsecGM16790                 |
| CG14089                                 | CG14367                                 |
| CG14095                                 | CG14383                                 |
| CG14118                                 | CG14408                                 |
| CG14141                                 | CG14440                                 |
| CG14182                                 | CG14442                                 |
| CG14184                                 | CG14448                                 |
| CG14191 /// DmauCG14191 /// DsimCG14191 | CG14457                                 |
| CG14195                                 | CG14471                                 |
| CG14196                                 | CG14479                                 |
| CG14215                                 | CG14480                                 |
| CG14222                                 | CG14488                                 |
| CG14223                                 | CG14505                                 |
| CG14225                                 | CG14509                                 |
| CG14244                                 | CG14556                                 |
| CG14257                                 | CG14567                                 |
| CG14265                                 | CG14589                                 |
| CG14270                                 | CG14608                                 |
| CG14275                                 | CG14609 /// DpseGA13108                 |
| CG14291 /// DpseGA12883 /// DvirGJ14185 | CG14610                                 |
| CG14299                                 | CG1463                                  |
| CG14321                                 | CG14631                                 |
| CG14375                                 | CG14642                                 |
| CG14397                                 | CG14658                                 |
| CG14401                                 | CG14659                                 |
| CG1443                                  | CG14684                                 |
| CG14435                                 | CG14691                                 |
| CG14439                                 | CG14695                                 |
| CG14454 /// CG32453                     | CG14709                                 |
| CG14476                                 | CG14712                                 |
| CG14482                                 | CG14718 /// DmauCG14718 /// DsimGD18777 |

|                                         |                         |
|-----------------------------------------|-------------------------|
| CG14511                                 | CG14731 /// CG2921      |
| CG14512                                 | CG14759                 |
| CG14526                                 | CG14763                 |
| CG14528                                 | CG14838                 |
| CG14561 /// DmojCG14561 /// DvirCG14561 | CG14850                 |
| CG14564                                 | CG14852                 |
| CG14570                                 | CG14861                 |
| CG14629                                 | CG14879                 |
| CG14641                                 | CG14898                 |
| CG14642                                 | CG14926                 |
| CG14671                                 | CG14974                 |
| CG14681 /// Skeletor                    | CG14995                 |
| CG14686                                 | CG15019                 |
| CG14688                                 | CG15025                 |
| CG14710                                 | CG15034                 |
| CG14749                                 | CG15035                 |
| CG14752                                 | CG15040                 |
| CG14810                                 | CG15043 /// DsimCG15043 |
| CG14826                                 | CG15065                 |
| CG14856                                 | CG15067                 |
| CG14881                                 | CG15099 /// DmirCG15099 |
| CG14946                                 | CG15109                 |
| CG14963                                 | CG15125                 |
| CG15021                                 | CG15127                 |
| CG15022                                 | CG15128                 |
| CG15046                                 | CG1513                  |
| CG15116                                 | CG15136                 |
| CG1516                                  | CG15145                 |
| CG15170                                 | CG15177                 |
| CG15201                                 | CG15203                 |
| CG15209                                 | CG15208                 |
| CG15212                                 | CG15219                 |
| CG15282                                 | CG15258                 |
| CG15313                                 | CG15260                 |
| CG15317                                 | CG15286                 |
| CG1532                                  | CG15296                 |
| CG15343 /// DsimCG15343                 | CG15306                 |
| CG15353                                 | CG15314                 |
| CG15404                                 | CG15323 /// DsimCG15323 |
| CG15406                                 | CG15333                 |
| CG15408                                 | CG15347                 |
| CG15414                                 | CG15387                 |
| CG15422                                 | CG15403                 |
| CG15431                                 | CG15418                 |
| CG15528                                 | CG15423                 |
| CG15531                                 | CG15425                 |
| CG15544                                 | CG15434                 |



CG15695  
CG15701  
CG15706  
CG15727  
CG15771  
CG15772  
CG15773  
CG15822  
CG15896  
CG1607 /// Tpi  
CG1632  
CG16733  
CG16734  
CG1675  
CG1678  
CG16786  
CG16790  
CG16798  
CG16812  
CG16820  
CG16892  
CG16903  
CG16926  
CG1695  
CG16989  
CG17002  
CG17026  
CG1707  
CG17124  
CG17184  
CG17190  
CG17192  
CG17224  
CG17249  
CG17259  
CG17264  
CG17282  
CG1732  
CG17322  
CG17323  
CG17327  
CG9133  
CG17331  
CG17333  
CG17360  
CG17556 /// CG3678  
CG17571

CG15452  
CG15461  
CG15465  
CG15475  
CG15482  
CG15510  
CG15530  
CG15533  
CG15543  
CG15576  
CG15580  
CG15605  
CG15625  
CG15631  
CG15657  
CG15676  
CG15705  
CG1571  
CG15711  
CG15719  
CG15734  
CG15745  
CG15765  
CG15800  
CG15818 /// DsimCG15818  
CG15870  
CG15873  
CG15878  
CG15909  
CG15922  
CG1625  
CG1631  
CG1657  
CG16711  
CG16716  
CG1673  
CG16736  
CG16739  
CG16741  
CG16758  
CG16762  
CG16782  
CG1681  
CG16836  
CG16848  
CG16854  
CG16888

|                  |                     |
|------------------|---------------------|
| CG17597 /// ScpX | CG16894             |
| CG17662          | CG16941             |
| CG17680          | CG16964             |
| CG17712          | CG16972             |
| CG17721          | CG16995             |
| CG17726          | CG17003             |
| CG1773           | CG17010             |
| CG17751          | CG17019             |
| CG17754          | CG17030             |
| CG17760          | CG17048             |
| CG17776          | CG17083             |
| CG17840          | CG17108 /// CG40263 |
| CG17919          | CG17109             |
| CG1792           | CG17141             |
| CG17928          | CG17154             |
| CG18004          | CG17196             |
| CG1809           | CG17217             |
| CG18095          | CG17237             |
| CG18249          | CG1724              |
| CG18259          | CG17258             |
| CG18343          | CG1732 /// CG6218   |
| CG18446          | CG17344             |
| CG18493          | CG17350             |
| CG18542          | CG17376             |
| CG32939          | CG17377 /// os      |
| CG18549          | CG17380             |
| CG18557          | CG17387             |
| CG18577          | CG17470             |
| CG18585          | CG17567             |
| CG18600          | CG17598             |
| CG1887           | CG17612             |
| CG1896           | CG17618             |
| CG1902           | CG6982              |
| CG1927           | CG17625             |
| CG1942           | CG17648             |
| CG1968           | CG17666             |
| CG1969           | CG17669             |
| CG2023           | CG17724 /// seq     |
| CG2034           | CG17744             |
| CG2065           | CG17764             |
| CG2076           | CG17856             |
| CG2091           | CG17904             |
| CG2144           | CG17930             |
| CG2147           | CG17944             |
| CG2177           | CG18067             |
| CG2199           | CG18107             |
| CG2211           | CG18109             |

|                                |                     |
|--------------------------------|---------------------|
| CG2277                         | CG18132             |
| CG2493 /// DsecGM23324         | CG18171             |
| CG2543                         | CG18179             |
| CG2604 /// DsimGD19638         | CG18193             |
| CG2641                         | CG1826              |
| CG2663                         | CG18273             |
| CG2680                         | CG1832              |
| CG2767                         | CG1835              |
| CG2774                         | CG18371             |
| CG2781                         | CG18404             |
| CG2812                         | CG18410             |
| CG2818                         | CG18418             |
| CG2889                         | CG18449             |
| CG2909                         | CG18536             |
| CG2930                         | CG18539             |
| CG2941 /// CG32783 /// CG32786 | CG18545             |
| CG2943                         | CG18598             |
| CG2962                         | CG18619             |
| CG30016                        | CG18635             |
| CG30031 /// CG4269             | CG18649             |
| CG30091                        | CG18662             |
| CG30100 /// CG42372            | CG18666             |
| CG30157                        | CG18675 /// tipE    |
| CG30172                        | CG18744             |
| CG30196                        | CG18749 /// CG33722 |
| CG30197                        | CG18810             |
| CG30217                        | CG18853 /// phr     |
| CG3033                         | CG1958              |
| CG30359                        | CG1979              |
| CG30360                        | CG1988              |
| CG30377                        | CG1999              |
| CG30380                        | CG2006              |
| CG30381                        | CG2053              |
| CG30392                        | CG2083              |
| CG30410                        | CG2137              |
| CG30423                        | CG2225              |
| CG30427                        | CG2249              |
| CG30431                        | CG2577              |
| CG30466                        | CG2616              |
| CG30503 /// kappaB-Ras         | CG2750              |
| CG31030                        | CG2854              |
| CG31075 /// DsecCG31075        | CG2861              |
| CG31100                        | CG2865              |
| CG31104                        | CG2871              |
| CG31111                        | CG2926              |
| CG31125                        | CG30008             |
| CG31145                        | CG30022 /// CR40100 |

|                     |                                 |
|---------------------|---------------------------------|
| CG3117              | CG30026                         |
| CG31223             | CG30039                         |
| CG31272             | CG30056                         |
| CG31274 /// MESK4   | CG30058 /// CG34235 /// CG34312 |
| CG31321             | CG30099                         |
| CG31344             | CG30108 /// CG30109             |
| CG31370             | CG30110                         |
| CG31373             | CG30178                         |
| CG31406             | CG30192                         |
| CG31446             | CG30194                         |
| CG31460             | CG30222                         |
| CG31496             | CG30271                         |
| CG31522             | CG30278                         |
| CG31548             | CG30281                         |
| CG31549             | CG30286                         |
| CG31663             | CG30321                         |
| CG31672             | CG30324                         |
| CG3168              | CG30334                         |
| CG31683             | CG30343                         |
| CG31687 /// CG31688 | CG30354                         |
| CG31698             | CG30355                         |
| CG31729             | CG30356                         |
| CG31775 /// CG42586 | CG30369                         |
| CG31778             | CG30384                         |
| CG31809             | CG33140                         |
| CG31810             | CG30389                         |
| CG3184              | CG30393                         |
| CG31917 /// Tfb5    | CG30398                         |
| CG31919 /// CG33995 | CG30412                         |
| CG3192              | CG30432                         |
| CG31937             | CG30441                         |
| CG31953 /// gkt     | CG30459                         |
| CG31955             | CG30460                         |
| CG32023             | CG30461 /// ste24c              |
| CG32039             | CG30487                         |
| CG32069             | CG30497                         |
| CG32073             | CG30502                         |
| CG32115             | CG3056                          |
| CG32187             | CG3062                          |
| CG32191             | CG3085                          |
| CG32195             | CG31004                         |
| CG32198             | CG31007                         |
| CG32212             | CG31008                         |
| CG32267             | CG31029                         |
| CG32281             | CG31055                         |
| CG32425             | CG31087                         |
| CG32441             | CG31091                         |

|                                 |                         |
|---------------------------------|-------------------------|
| CG32447                         | CG31161                 |
| CG32495 /// GS                  | CG31169                 |
| CG32500 /// CG32857 /// CG33502 | CG31178 /// DsimGD20903 |
| CG32506                         | CG31195                 |
| CG32536 /// CG32537             | CG31206                 |
| CG32579                         | CG3121                  |
| CG32581 /// CG8974              | CG31210                 |
| CG32590                         | CG31213                 |
| CG32603                         | CG31226                 |
| CG32626                         | CG31230                 |
| CG3264                          | CG31231                 |
| CG32649                         | CG3124                  |
| CG32662                         | CG31244                 |
| CG32669                         | CG31286                 |
| CG32698                         | CG31287 /// Eno         |
| CG3277                          | CG31294                 |
| CG32803                         | CG31323                 |
| CG3281                          | CG31327                 |
| CG3285                          | CG31352                 |
| CG3292                          | CG31407                 |
| CG33013                         | CG31468 /// DsimGD18362 |
| CG3303 /// CR31292              | CG31482                 |
| CG33051                         | CG31528                 |
| CG33129                         | CG31531                 |
| CG33138 /// DsecCG33138         | CG31534                 |
| CG33143                         | CG31538                 |
| CG33145                         | CG31542                 |
| CG33155 /// mRpL53              | CG31546                 |
| CG33268 /// CG7377              | CG31624 /// DsimGD21644 |
| CG33272                         | CG31635                 |
| CG33281                         | CG31639 /// Uch-L3      |
| CG3332                          | CG31642                 |
| CG33346                         | CG31644                 |
| CG3337                          | CG31679                 |
| CG3342                          | CG31693                 |
| CG3344                          | CG31697                 |
| CG33465                         | CG31702 /// CG31703     |
| CG3347                          | CG31709                 |
| CG3348                          | CG31712                 |
| CG33493                         | CG31740                 |
| CG33514                         | CG31742                 |
| CG3355                          | CG31752                 |
| CG3363                          | CG31769                 |
| CG33635                         | CG31773                 |
| CG3376                          | CG31781                 |
| CG33785 /// CG33786             | CG31782                 |
| CG33932 /// Rpp20               | CG31788                 |

|                     |                         |
|---------------------|-------------------------|
| CG3394              | CG31802                 |
| CG33966             | CG31804                 |
| CG3397              | CG31806                 |
| CG33970             | CG31815                 |
| CG34057             | CG31816                 |
| CG3407              | CG31861                 |
| CG3408              | CG31870                 |
| CG34116             | CG31874                 |
| CG34125             | CG31894                 |
| CG3420              | CG31907                 |
| CG34247             | CG31909                 |
| CG34248             | CG31910                 |
| CG34253             | CG31920                 |
| CG34278             | CG31924                 |
| CG34279             | CG31958                 |
| CG34331             | CG31960                 |
| CG34349             | CG31974                 |
| CG34350             | CG31988                 |
| CG3436              | CG3199                  |
| CG34386             | CG32000                 |
| CG34396             | CG32026                 |
| CG34408             | CG32043                 |
| CG34422             | CG32063                 |
| CG34445 /// CG34446 | CG32064 /// DsimGD14244 |
| CG3446              | CG32117                 |
| CG3500              | CG3213                  |
| CG3502              | CG32138                 |
| CG3505              | CG32141                 |
| CG3511              | CG32148                 |
| CG3527              | CG32152                 |
| CG3532              | CG32163                 |
| CG3556              | CG32181                 |
| CG3560              | CG3222                  |
| CG3570              | CG32240                 |
| CG3588              | CG32284                 |
| CG3589              | CG32295                 |
| CG3603              | CG32298 /// CG32299     |
| CG3618              | CG32313                 |
| CG3621              | CG32368                 |
| CG3632              | CG32371                 |
| CG3652              | CG32379                 |
| CG3663              | CG32388                 |
| CG3690              | CG32396                 |
| CG3706              | CG32437                 |
| CG3731              | CG32440                 |
| CG3734              | CG32450                 |
| CG3735              | CG32459                 |

|                        |                                     |
|------------------------|-------------------------------------|
| CG3797                 | CG32461                             |
| CG3803                 | CG32541 /// CG42506                 |
| CG3819                 | CG32568                             |
| CG3823                 | CG32573 /// CG42512                 |
| CG3829                 | CG32582                             |
| CG3842                 | CG32588                             |
| CG3857                 | CG32628                             |
| CG3894                 | CG32655                             |
| CG3984                 | CG32663                             |
| CG40002                | CG32686                             |
| CG4019                 | CG32694                             |
| CG4020                 | CG32699                             |
| CG4041                 | CG32700 /// DsimGD16059             |
| CG4045                 | CG32703                             |
| CG4080                 | CG32713 /// CG33223 /// DsimCG32713 |
| CG4096                 | CG32758                             |
| CG4168                 | CG32791                             |
| CG4169                 | CG32806                             |
| CG4210                 | CG32809                             |
| CG42231 /// chif       | CG32829                             |
| CG42235                | CG32832                             |
| CG42246                | CG32835                             |
| CG42255                | CG32845                             |
| CG42269                | CG32945                             |
| CG42327                | CG32971                             |
| CG42336                | CG32982                             |
| CG42370                | CG33054                             |
| CG4250                 | CG33057                             |
| CG42511 /// CG8135     | CG3306                              |
| CG42542                | CG33111                             |
| CG42575                | CG33136                             |
| CG4259                 | CG33189                             |
| CG4278                 | CG33199 /// CG8229                  |
| CG4287                 | CG33218                             |
| CG4288                 | CG33225                             |
| CG4293                 | CG33229                             |
| CG4302 /// DsecCG4302  | CG3323                              |
| CG4306                 | CG33232                             |
| CG4330                 | CG33235                             |
| CG4332                 | CG33284                             |
| CG4338                 | CG33293                             |
| CG4365                 | CG3330 /// DwilGK11338              |
| CG4382                 | CG33308                             |
| CG4386                 | CG33322                             |
| CG4390 /// DpseGA18152 | CG33340                             |
| CG4398                 | CG33345                             |
| CG4400                 | CG33462                             |

|                        |                     |
|------------------------|---------------------|
| CG4406                 | CG33469             |
| CG4407                 | CG33470             |
| CG4408                 | CG33489             |
| CG4409                 | CG33541             |
| CG4447                 | CG33691 /// CG33692 |
| CG4462                 | CG33773             |
| CG4496                 | CG33937             |
| CG4500 /// DsecCG4500  | CG33960             |
| CG4502                 | CG33969 /// fbl     |
| CG4572 /// DpseGA18267 | CG33978             |
| CG4594                 | CG34005             |
| CG4627                 | CG34021             |
| CG4630                 | CG34026             |
| CG4645                 | CG34029             |
| CG4646                 | CG3409              |
| CG4662                 | CG34104 /// Tequila |
| CG4670                 | CG34110             |
| CG4702                 | CG34114             |
| CG4721                 | CG34126             |
| CG4725                 | CG34161             |
| CG4743                 | CG34168             |
| CG4749                 | CG34171             |
| CG4752                 | CG34175             |
| CG4774                 | CG34188             |
| CG4785                 | CG34204             |
| CG4789                 | CG34210             |
| CG4797                 | CG34230             |
| CG4822                 | CG34231             |
| CG4842                 | CG34245             |
| CG4860                 | CG34261             |
| CG4866                 | CG34265             |
| CG4884                 | CG34269             |
| CG4908                 | CG34274             |
| CG4927                 | CG34283             |
| CG4945                 | CG34300             |
| CG4950                 | CG34347             |
| CG4953                 | CG34354             |
| CG4973 /// DpseGA18564 | CG34360             |
| CG4975 /// CG4984      | CG34386             |
| CG5002                 | CG34394             |
| CG5013                 | CG34398             |
| CG5021                 | CG34400             |
| CG5033                 | CG34401             |
| CG5112                 | CG34409             |
| CG5151                 | CG34417             |
| CG5162                 | CG34449             |
| CG5167                 | CG3492              |



|                                                |                                 |
|------------------------------------------------|---------------------------------|
| CG5174                                         | CG3517                          |
| CG5180                                         | CG3565                          |
| CG5191                                         | CG3581                          |
| CG5210                                         | CG3700 /// DmirCG3700 /// MED23 |
| CG5224                                         | CG3719                          |
| CG5254                                         | CG3732                          |
| CG5292                                         | CG3740                          |
| CG5315                                         | CG3777                          |
| CG5321                                         | CG3800                          |
| CG5322                                         | CG3809                          |
| CG5325                                         | CG3814 /// TTLL3B               |
| CG5339                                         | CG3875                          |
| CG5362                                         | CG3884                          |
| CG5412                                         | CG3940                          |
| CG5414                                         | CG3982                          |
| CG5439                                         | CG40115                         |
| CG5466                                         | CG40178 /// CG41320             |
| CG5484                                         | CG40470                         |
| CG5532                                         | CG40625 /// JYalpha             |
| CG5535                                         | CG41284 /// CG42598             |
| CG5577                                         | CG4194                          |
| CG5612                                         | CG42232                         |
| CG5618                                         | CG42258                         |
| CG5630                                         | CG42288                         |
| CG5641                                         | CG42330                         |
| CG5656                                         | CG42335                         |
| CG5703                                         | CG42355                         |
| CG5756                                         | CG42374 /// CG9666              |
| CG5758                                         | CG42383                         |
| CG5770                                         | CG42388                         |
| CG5773                                         | CG42390                         |
| CG5830                                         | CG42394                         |
| CG5844                                         | CG42448                         |
| CG5854 /// DgriCG5854 /// DmojCG5854 /// DvirC | CG42450                         |
| CG5861                                         | CG42457 /// cpo                 |
| CG5867                                         | CG42487                         |
| CG5885                                         | CG42493                         |
| CG5946 /// zetaCOP                             | CG42533                         |
| CG5976                                         | CG42559 /// CG42560             |
| CG5989                                         | CG42565                         |
| CG5999                                         | CG42568 /// DnaJ-60             |
| CG6020                                         | CG42570                         |
| CG6067                                         | CG42574                         |
| CG6084                                         | CG42579 /// CG42580             |
| CG6126                                         | CG42588                         |
| CG6195                                         | CG42591                         |
| CG6196                                         | CG42593                         |

|                       |                                      |
|-----------------------|--------------------------------------|
| CG6204                | CG42613                              |
| CG6231                | CG42637                              |
| CG6276                | CG4266                               |
| CG6283                | CG4270                               |
| CG6293                | CG4297                               |
| CG6294                | CG4329                               |
| CG6299                | CG4362                               |
| CG6295                | CG4367                               |
| CG6296                | CG4375                               |
| CG6340                | CG4477                               |
| CG6356                | CG4546                               |
| CG6361                | CG4562                               |
| CG6370                | CG4619                               |
| CG6388                | CG4623                               |
| CG6410                | CG4631                               |
| CG6459                | CG4661                               |
| CG6506                | CG4662                               |
| CG6511                | CG4680                               |
| CG6540                | CG4681                               |
| CG6583                | CG4683                               |
| CG6607                | CG4706                               |
| CG6613                | CG4716 /// DsimGD10957               |
| CG6617                | CG4744                               |
| CG6621                | CG4757                               |
| CG6650                | CG4810                               |
| CG6656                | CG4825 /// DsecGM22203               |
| CG6660                | CG4829                               |
| CG6704                | CG4836 /// DsecGM17688               |
| CG6726                | CG4839                               |
| CG6729                | CG4857                               |
| CG6746                | CG4911                               |
| CG6753                | CG4955                               |
| CG6758 /// DmirCG6758 | CG4956                               |
| CG6805                | CG4962 /// DmauCG4962 /// DsimCG4962 |
| CG6834                | CG4988                               |
| CG6910                | CG5011                               |
| CG6915                | CG5017                               |
| CG6928                | CG5024                               |
| CG7011                | CG5048                               |
| CG7016                | CG5062                               |
| CG7083                | CG5071                               |
| CG7084                | CG5089                               |
| CG7115                | CG5116                               |
| CG7133                | CG5122                               |
| CG7145                | CG5139                               |
| CG7146                | CG5144                               |
| CG7172                | CG5204                               |

|                       |                                       |
|-----------------------|---------------------------------------|
| CG7179                | CG5217                                |
| CG7181                | CG5265                                |
| CG7191                | CG5280                                |
| CG7203                | CG5326                                |
| CG7215 /// Prx5       | CG5357                                |
| CG7246                | CG5398                                |
| CG7275                | CG5399                                |
| CG7277                | CG5435                                |
| CG7290                | CG5538                                |
| CG7294                | CG5550                                |
| CG7300                | CG5556                                |
| CG7322                | CG5565 /// DsimCG5565                 |
| CG7330                | CG5614                                |
| CG7342                | CG5664                                |
| CG7367                | CG5762 /// DmauCG5762 /// DsimGD18296 |
| CG7372                | CG5778                                |
| CG7402                | CG5781                                |
| CG7430 /// DsimCG7430 | CG5840                                |
| CG7442                | CG5853                                |
| CG7448                | CG5872                                |
| CG7466                | CG5953                                |
| CG7470                | CG5968                                |
| CG7497                | CG5987                                |
| CG7518                | CG6006                                |
| CG7519                | CG6045                                |
| CG7536                | CG6049                                |
| CG7550                | CG6083                                |
| CG7567                | CG6138                                |
| CG7582                | CG6140                                |
| CG7587                | CG6175                                |
| CG7603                | CG6182                                |
| CG7607                | CG6209                                |
| CG7627                | CG6271                                |
| CG7630                | CG6279                                |
| CG7671                | CG6327                                |
| CG7675                | CG6330                                |
| CG7685                | CG6337                                |
| CG7695                | CG6340                                |
| CG7713                | CG6357                                |
| CG7745                | CG6372                                |
| CG7763                | CG6380                                |
| CG7772                | CG6441                                |
| CG7777                | CG6497                                |
| CG7789                | CG6527                                |
| CG7824                | CG6569                                |
| CG7830                | CG6629                                |
| CG7840                | CG6738                                |

|                        |                        |
|------------------------|------------------------|
| CG7860                 | CG6745                 |
| CG7882                 | CG6751                 |
| CG7906                 | CG6763                 |
| CG7914                 | CG6789                 |
| CG7916                 | CG6873                 |
| CG7920                 | CG6888                 |
| CG7943                 | CG6893                 |
| CG7949                 | CG6901                 |
| CG7997                 | CG6905                 |
| CG8012                 | CG6967                 |
| CG8021                 | CG6971                 |
| CG8031                 | CG6980                 |
| CG8067                 | CG6996                 |
| CG8083                 | CG7024                 |
| CG8100                 | CG7029                 |
| CG8111                 | CG7039                 |
| CG8112                 | CG7045                 |
| CG8132                 | CG7046                 |
| CG8159                 | CG7059                 |
| CG8180                 | CG7069                 |
| CG8193                 | CG7120                 |
| CG8211                 | CG7164                 |
| CG8229                 | CG7182                 |
| CG8232 /// Rcp         | CG7188                 |
| CG8239                 | CG7202                 |
| CG8270                 | CG7211                 |
| CG8306                 | CG7229                 |
| CG8314                 | CG7248                 |
| CG8315                 | CG7262                 |
| CG8326 /// DyakGE15584 | CG7264                 |
| CG8360                 | CG7276                 |
| CG8372                 | CG7295                 |
| CG8389                 | CG7324                 |
| CG8412                 | CG7337                 |
| CG8443                 | CG7357                 |
| CG8446                 | CG7366                 |
| CG8507                 | CG7422                 |
| CG8519                 | CG7431                 |
| CG8543                 | CG7441 /// DsimGD14730 |
| CG8550                 | CG7514                 |
| CG8560 /// DsecCG8560  | CG7557                 |
| CG8562                 | CG7638                 |
| CG8586                 | CG7650                 |
| CG8661                 | CG7669                 |
| CG8668                 | CG7707                 |
| CG8768                 | CG7768                 |
| CG8778 /// DmirCG8778  | CG7813                 |

|                       |                   |
|-----------------------|-------------------|
| CG8786                | CG7839            |
| CG8889                | CG7886            |
| CG8928                | CG7907            |
| CG8931                | CG8008            |
| CG8965                | CG8038            |
| CG8997 /// DsimCG8997 | CG8060            |
| CG9018                | CG8066            |
| CG9034                | CG8078            |
| CG9065                | CG8086            |
| CG9067                | CG8087            |
| CG9090                | CG8097            |
| CG9107                | CG8129            |
| CG9119                | CG8187            |
| CG9125                | CG8206            |
| CG9154                | CG8292            |
| CG9172 /// TSG101     | CG8297            |
| CG9186                | CG8299            |
| CG9205                | CG8320            |
| CG9220                | CG8405            |
| CG9257                | CG8407            |
| CG9259                | CG8494            |
| CG9267                | CG8500            |
| CG9302                | CG8517            |
| CG9306                | CG8526            |
| CG9312                | CG8557            |
| CG9331                | CG8564            |
| CG9368                | CG8620            |
| CG9372                | CG8630            |
| CG9394                | CG8671            |
| CG9427                | CG8701            |
| CG9452                | CG8712            |
| CG9458                | CG8746            |
| CG9486                | CG8750            |
| CG9505                | CG8840            |
| CG9572                | CG8851            |
| CG9576                | CG8852            |
| CG9577                | CG8907            |
| CG9616                | CG8944            |
| CG9662                | CG8949            |
| CG9664                | CG9007            |
| CG9682                | CG9016            |
| CG9689                | CG9062            |
| CG9702                | CG9086            |
| CG9717                | CG9106            |
| CG9769                | CG9129            |
| CG9801                | CG9130 /// CG9133 |
| CG9812                | CG9194            |

CG9813  
CG9826  
CG9837  
CG9867  
CG9870  
CG9903  
CG9914 /// DsecCG9914  
CG9917  
CG9934  
CG9945  
CG9953  
CG9987  
CG9989  
CG9996  
Chrac-16  
Cht11  
Cht2  
ck  
Cka  
ckd  
CIC-b  
cln3  
clt  
cni  
cnir  
Cog7  
colt  
Cp18  
Cp38  
Cpr30F  
Cpr64Ab  
Cpr64Ad  
Cpr65Av  
Cpr65Ea  
Cpr65Ec  
Cpr66Cb  
Cpr67Fa1 /// Cpr67Fa2  
Cpr78Ca  
Cpr97Ea  
CR32207  
Cralbp  
crim  
croc  
CSN6  
CstF-50  
csul  
CtBP

CG9254  
CG9263 /// Yp1  
CG9281  
CG9314  
CG9328  
CG9389  
CG9445  
CG9498  
CG9550  
CG9570  
CG9624  
CG9650  
CG9733  
CG9836  
CG9875  
CG9894  
CG9896  
CG9902  
CG9920  
CG9948  
CG9975  
CHES-1-like  
chinmo  
CHMP2B  
chn  
chrb  
chrw  
Cht12  
Cht4  
cic  
cindr  
Cip4  
Cklalpha  
CLIP-190  
cmet  
cno  
cora  
cp309  
Cpr47Eb  
Cpr51A  
cpx /// SNF4Agamma  
CR18854  
CR32690  
crol  
crp  
CS-2  
CTCF

Ctr1A  
cyc  
Cyp12c1  
Cyp12d1-d  
Cyp12d1-p  
Cyp12e1  
Cyp304a1  
Cyp309a1  
Cyp4ad1  
Cyp4d1  
Cyp4d2  
Cyp4e2  
Cyp4p1  
Cyp6a17  
Cyp6d2  
Cyp6d5  
Cyp6g1  
Cyp6g2  
Cyp6t1  
Cyp6v1  
Cyp6w1  
dan  
danr  
daw  
dbr  
Dcp1  
Der-1  
dik  
Dim1  
Dip-B  
DNAPol-alpha73  
DNasell  
dnp  
Drip  
dro4  
dro5  
dsx  
E(spl)  
E(var)3-9  
e(y)1  
ea  
Eaat1  
eater  
ECSIT  
Ect3  
Edem1  
edl

Ctr1B  
cv-c  
CycT  
Cyp28a5  
Cyp310a1  
Cyp4g1  
Cyp4p2  
Cyp4p3  
Cyp6a18  
Cyp6a23  
Cys  
Cyt-c-d  
Damm  
Dcp2  
Def  
Dgk  
Dhap-at  
Dhc36C  
dia  
Dif  
disco  
djl  
dl  
dlg1  
dlp  
dm  
Doa  
DopEcR  
dpld /// wech  
DptB  
Dpy-30L2  
Drak  
Drep-2  
drk  
drm  
dro2  
dro3  
Drs  
Dscam  
dsx  
dtr  
dve  
Dys  
E(bx)  
E(Pc)  
ed  
Edc3

|                 |                   |
|-----------------|-------------------|
| EDTP            | Edg91             |
| Efr             | eIF-4B            |
| egg             | eIF4E-4           |
| eIF2B-beta      | eIF4E-7           |
| eIF2B-delta     | eIF4G2            |
| eIF4AIII        | Eip75B            |
| Eig71Ee         | elav              |
| Eip75B          | endoB             |
| eIB             | ERR               |
| elgi            | ex                |
| Elp2            | exex              |
| ema             | exu               |
| Eo              | faf               |
| epsilonCOP      | fan               |
| epsilonTry      | fau               |
| erm             | fd68A             |
| esg             | Fie               |
| ey              | Fili              |
| Fas2            | Fim               |
| fat-spondin     | Fip1              |
| fau             | Fis1              |
| fd96Ca          | fkf               |
| Fdh             | FLASH             |
| ferrochelatase  | foxo              |
| Fhos            | fru               |
| flr             | fry               |
| fok             | fs(1)h            |
| for             | Fs(2)Ket          |
| fra             | ftz-f1            |
| fray            | fzo               |
| frj             | G9a               |
| fu              | Galpha49B         |
| Fur1            | Gap1              |
| fusl            | garz              |
| fy              | GATAd             |
| Gal             | gdl /// gdl-ORF39 |
| Gapdh1          | Gem3              |
| Gapdh2          | Gfat1             |
| Gas41           | Gie               |
| gb /// Oatp58Db | gish              |
| gcm             | glec              |
| gek             | glob2             |
| Gen             | Glycogenin        |
| Gfr             | gom               |
| Gip             | grp               |
| GlcAT-I         | Grx-1             |
| GlcAT-P         | GstD2             |



|                   |                                              |
|-------------------|----------------------------------------------|
| GlcT-1            | Gug                                          |
| Gli               | hep                                          |
| GlyP              | her                                          |
| Gmer              | Herp                                         |
| GNBP3             | Hex-A                                        |
| Gpdh              | hgo                                          |
| Gpi1              | how                                          |
| granny-smith      | HP1e                                         |
| Grasp65           | HP6                                          |
| grass             | hrg                                          |
| GRHR              | Hsc70-1                                      |
| Gs1               | Hsc70-2                                      |
| Gs1l              | Hsp22 /// Hsp67Bb                            |
| Gs2               | Hsp60B                                       |
| GstD3             | Hsp68                                        |
| GstE10            | Hsp70Aa /// Hsp70Ab                          |
| GstE3             | Hsp70Ba /// Hsp70Bb /// Hsp70Bbb /// Hsp70Bc |
| GstE7             | htt                                          |
| GstE9             | ia2                                          |
| GV1               | ifc                                          |
| H15               | ik2                                          |
| HBS1              | IM1                                          |
| HDAC6             | IM10                                         |
| He                | IM2                                          |
| Hem               | IM23                                         |
| Hexo2             | IM3                                          |
| Hf                | Imp                                          |
| His3.3A           | inaE                                         |
| HLHm7             | insc                                         |
| HLHmdelta         | IP3K1                                        |
| Hml               | I-t                                          |
| hoe2              | itp                                          |
| HP1b              | janB                                         |
| HP1c              | jim                                          |
| HPS1              | jing                                         |
| Hr39              | Jupiter                                      |
| Hr78              | kay                                          |
| Hrd3              | kek5                                         |
| Hs2st             | kel                                          |
| Hsp22 /// Hsp67Bb | klg                                          |
| Hsp67Bc           | Klp10A                                       |
| ihog              | Klp59C                                       |
| llp2              | Klp98A                                       |
| llp3              | kst                                          |
| ImpL2             | Kua                                          |
| inaF-D            | kuz                                          |
| Indy              | I(1)G0045                                    |

|                         |                             |
|-------------------------|-----------------------------|
| Ing3                    | I(1)G0196                   |
| Ino80                   | I(1)G0469                   |
| Invadolysin             | I(2)k16918                  |
| iPLA2-VIA               | I(3)neo38                   |
| Ipp                     | Lasp                        |
| isopeptidase-T-3        | IdlCp                       |
| jdp                     | lectin-37Da /// lectin-37Db |
| Jhe                     | lectin-46Ca                 |
| Jhedup                  | Lerp                        |
| Jheh2                   | lilli                       |
| Jon25Biii               | Lim3                        |
| Jon65Aii                | Listericin                  |
| Jon66Cii                | lola                        |
| Jon74E                  | LRP1                        |
| Jon99Ci                 | LysX                        |
| Jon99Fi                 | Madm                        |
| jub                     | mahj                        |
| kar                     | mam                         |
| Kaz1-ORFA /// Kaz1-ORFB | Mapmodulin                  |
| kek1                    | mask                        |
| KLHL18                  | Mef2                        |
| Klp64D                  | mei-217 /// mei-218         |
| kn                      | mei-P26                     |
| knk                     | Menl-1 /// Menl-2           |
| Kr                      | MESK2                       |
| I(1)G0004               | mew                         |
| I(1)G0007               | Mical                       |
| I(1)G0144               | milt                        |
| I(1)G0156               | mirr                        |
| I(1)G0230               | Mkp3                        |
| I(2)01289               | Mmp1                        |
| I(2)01810               | mnb                         |
| I(2)03659               | Mnt                         |
| I(2)35Di                | mod(mdg4)                   |
| I(2)37Cb                | mof                         |
| I(2)efl                 | Mrtf                        |
| I(2)k09913              | msl-3                       |
| I(2)not                 | msn                         |
| LanA                    | mspo                        |
| Las                     | msps                        |
| Lcch3                   | Mst35Ba                     |
| Lcp2                    | Mst35Bb                     |
| Lcp65Ac                 | Mst77F                      |
| lectin-24Db             | Mst84Da                     |
| lectin-28C /// ninaE    | Mst84Db                     |
| Leucokinin              | Mst84Dc                     |
| lig3                    | Mst84Dd                     |

|           |              |
|-----------|--------------|
| lin19     | Mst87F       |
| LKR       | Mst89B       |
| loj       | Mst98Cb      |
| Lsp1gamma | mthl1        |
| luna      | mthl10       |
| lva       | Mtk          |
| LvpH      | Mtl          |
| LysP      | MtnB         |
| m4        | Mtor         |
| M6        | mts          |
| Mad       | mtsh         |
| MAGE      | Muc18B       |
| malpha    | Muc26B       |
| Map60     | Muc55B       |
| mbm       | Muc68Ca      |
| Mcm2      | mud          |
| mdy       | Mur29B       |
| MED11     | mura         |
| MED14     | mus309       |
| MED18     | Myo95E       |
| MED28     | myoglianin   |
| mei-41    | MYPT-75D     |
| Mes2      | mys          |
| MESK2     | NaCP60E      |
| MESR6     | nAcRbeta-64B |
| Mf        | Ndae1        |
| Mfap1     | Nedd4        |
| mfas      | Nedd8        |
| Mgstl     | Nep3         |
| Mip       | NFAT         |
| miple     | nimC3        |
| mira      | nimC4        |
| mirr      | nito         |
| Mkrn1     | nkd          |
| mnd       | nol          |
| mod(mdg4) | nompB        |
| mor       | Nop60B       |
| MRG15     | nopo         |
| mrn       | norpA        |
| mRpL10    | Not1         |
| mRpL17    | Notum        |
| mRpL18    | Nrg          |
| mRpL23    | ns2          |
| mRpL28    | n-syb        |
| mRpL30    | Ntl          |
| mRpL41    | nub          |
| mRpL48    | nuf          |

|              |          |
|--------------|----------|
| mRpS11       | Nup160   |
| mRpS18B      | nxf4     |
| mRpS18C      | Oatp33Eb |
| mRpS2        | Obp50e   |
| mRpS22       | obst-H   |
| mRpS28       | obst-J   |
| mRpS31       | oc       |
| mthl3        | okr      |
| mthl4        | olf186-F |
| mthl5        | omd      |
| mthl6        | ome      |
| mthl8        | os       |
| mtm          | Pabp2    |
| Mur18B       | Paip2    |
| Mur89F       | Pak      |
| Myo28B1      | pan      |
| Myt1         | par-1    |
| nAcRbeta-21C | para     |
| Nc           | Pbp95    |
| ND23         | pcl      |
| Nelf-E       | Pde1c    |
| neo          | Pde6     |
| Nep1         | pdm2     |
| Nep2         | Pepck    |
| net          | PGRP-LF  |
| NetB         | PGRP-SB1 |
| nimB1        | phr      |
| nimB5        | Pif1A    |
| nimC1        | pigs     |
| nimC2        | Pino     |
| NitFhit      | Pka-C1   |
| NLaz         | Pka-R2   |
| Nmdmc        | Pkd2     |
| Nmt          | PMCA     |
| noc          | Pnn      |
| Nop56        | pnt      |
| Npc2c        | PNUTS    |
| Npc2d        | Pof      |
| Npc2g        | por      |
| Nplp4        | Porin2   |
| Nrg          | PP2A-B   |
| Nrk          | PpD5     |
| nrv1         | PpY-55A  |
| NtR          | PPYR1    |
| Nurf-38      | PQBP-1   |
| oaf          | pr       |
| Oatp58Da     | pros     |

|                         |             |
|-------------------------|-------------|
| Obp56a                  | Prosbeta2R2 |
| Obp56e                  | Psf3        |
| obst-A                  | psq         |
| obst-B                  | Ptp10D      |
| Odc1                    | Ptp4E       |
| O-fut1                  | Ptp61F      |
| O-fut2                  | Ptp99A      |
| Opbp                    | puc         |
| Orc6                    | pum         |
| Orct                    | pyd         |
| ORMDL                   | pygo        |
| Osi21                   | qjt         |
| Osi7                    | qua         |
| Ost48                   | qvr         |
| p120ctn                 | Rab2        |
| p24-2                   | rab3-GEF    |
| pall                    | Rab6        |
| Papss                   | Rala        |
| Pbgs                    | ran-like    |
| PCID2                   | Rbp2        |
| pea                     | Rcd2        |
| PebIII                  | rdx         |
| PEK                     | rec         |
| Peritrophin-A           | Rfx         |
| pex1                    | rha         |
| pex12                   | RhoGAP1A    |
| pex13                   | RhoGAP71E   |
| Pfk                     | rig         |
| Pgam5                   | Rip11       |
| Pgant35A                | rk          |
| pgant8                  | rl          |
| Pgd                     | r-l         |
| Pgk                     | rn          |
| Pgm                     | RN-tre      |
| PGRP-SA                 | robl22E     |
| PGRP-SC1a /// PGRP-SC1b | robl62A     |
| PH4alphaEFB             | Roc1b       |
| phm                     | rok         |
| Pi3K21B                 | roq         |
| Pi4KIIalpha             | row         |
| Pink1                   | Rox8        |
| pio                     | Rpb10       |
| Pis                     | RpL10Aa     |
| pnr                     | RpL12       |
| Pole2                   | RpL3        |
| POSH                    | RpS28-like  |
| Ppt1                    | RpS7        |

|            |                        |
|------------|------------------------|
| Prat2      | rut                    |
| Prestin    | RYBP                   |
| proPO-A1   | S                      |
| Pros28.1   | SAK                    |
| Prp18      | sala                   |
| Prx6005    | Sap47                  |
| Psc        | sas                    |
| Psf1       | sbb                    |
| psh        | sbr                    |
| Psn        | scb                    |
| Ptpa       | scramb1                |
| Ptr        | s-cup                  |
| Pxd        | scyl                   |
| Pxn        | sda                    |
| pyd3       | Sdic1                  |
| PyK        | Sdic3 /// Sdic4 /// sw |
| Rab35      | Sema-1a                |
| Rab4       | seq                    |
| Rae1       | Ser                    |
| raptor     | Ser6                   |
| Rbcn-3A    | Sh                     |
| Rbp1       | shakB                  |
| Rca1       | Shal                   |
| rdgC       | shep                   |
| regucalcin | shi                    |
| repo       | Shroom                 |
| rept       | Sin3A                  |
| rev7       | SIP2                   |
| RfC38      | skd                    |
| RFeSP      | skpD                   |
| Rh6        | slik                   |
| rho-5      | sm                     |
| ric8a      | Smg6                   |
| Rlb1       | sno                    |
| RnpS1      | sns                    |
| rod        | Socs36E                |
| rost       | sog                    |
| RplI140    | Sox100B                |
| RpL13A     | Sox15                  |
| RpL28      | Spargel                |
| RpL34b     | spaw                   |
| Rpn1       | spel1                  |
| Rpn12      | spheroid               |
| Rpn3       | spir                   |
| RpS11      | Spn                    |
| Rpt3       | Spn47C                 |
| Rrp4       | spri                   |

|             |            |
|-------------|------------|
| Rrp46       | Src64B     |
| rtet        | SRm160     |
| rtv         | Srp54k     |
| rumi        | ssh        |
| S6kII       | ssp2       |
| sad         | ssp4       |
| Saf-B       | ssp5       |
| salt        | Stim       |
| SamDC       | stwl       |
| santa-maria | sty        |
| sbb         | Su(dx)     |
| Scamp       | Su(var)3-7 |
| Sce         | sun        |
| sced        | sunz       |
| scu         | sut4       |
| SdhB        | swi2       |
| SdhC        | Syb        |
| Sdic3       | Syt1       |
| sec15       | Taf13      |
| Sec16       | Taf4       |
| sec5        | tai        |
| sec6        | Tango13    |
| SelR        | Tao-1      |
| Sfmbt       | t-cup      |
| Sgs1        | Tdc1       |
| Sgs5        | Tektin-C   |
| shark       | Tequila    |
| Side        | Thd1       |
| SIDL        | thoc6      |
| sinah       | Tim13      |
| Sirt4       | Tim17a1    |
| Slh         | Tim17b1    |
| slif        | Tim17b2    |
| slmb        | timeout    |
| SmD3        | tio        |
| Snr1        | Tk         |
| Sodh-1      | tlk        |
| Sox14       | Tm1        |
| Sp1         | tmod       |
| Sp7         | tombay20   |
| Spase25     | Top1       |
| Spc25       | Top3beta   |
| spdo        | TORC       |
| SPE         | TotA       |
| spict       | toy        |
| Sply        | Tpl94D     |
| Spn1        | Traf-like  |

|          |           |
|----------|-----------|
| Spn100A  | Trf4-1    |
| Spn28D   | TrxT      |
| Spn43Aa  | Tsp42Ec   |
| Spn43Ab  | Tsp66A    |
| Spn88Eb  | Tsp96F    |
| spn-E    | tst       |
| Spred    | ttm3      |
| Spt3     | tty       |
| Spt5     | tup       |
| Spt-I    | tutl      |
| Sptr     | tutl      |
| spz3     | Uba1      |
| spz6     | Ubc84D    |
| Sr-CI    | Ucp4B     |
| Srp68    | UGP       |
| SsRbeta  | Ugt86Dj   |
| Stam     | unk       |
| ste14    | Unr       |
| sty      | VACHT     |
| su(f)    | vav       |
| Su(fu)   | vg        |
| Sucb     | Vha14-2   |
| sug      | Vha16-1   |
| Surf1    | Vha16-2   |
| sxc      | Vha36-2   |
| Tace     | Vha68-3   |
| Taf10    | VhaM9.7-d |
| Taf7     | vir-1     |
| Tak1     | Vmat      |
| Tak11    | vn        |
| Tal      | Vsx1      |
| Tango5   | wapl      |
| Tango6   | w-cup     |
| Tango9   | wda       |
| tap      | wdb       |
| Tap42    | wkd       |
| Tapdelta | XRCC1     |
| Tcp-1eta | yellow-d2 |
| tef      | ymp       |
| Teh3     | yuri      |
| Tepl     | Zasp66    |
| Tepll    | zfh1      |
| tex      | zfh2      |
| TFAM     | zormin    |
| Tfb4     |           |
| tgo      |           |
| thetaTry |           |



Thiolase  
thoc5  
tko  
Tm1  
TM4SF  
Top3beta  
tra2  
Trc8  
trus  
Tsf1  
Tsf2  
Tsp3A  
Tsp42Ej  
Tsp42Ek  
Tsp42Ep  
Tsp74F  
Tsp86D  
TwdIC  
TwdIH  
TwdIK  
TwdIT  
U2A  
Ubc-E2H  
Ugt36Bc  
Ugt37b1  
UK114  
Unc-89  
up  
usnp  
VhaM9.7-a  
VhaM9.7-c  
vkg  
vls  
Vmat  
vtd  
w  
wbl  
wg  
wibg  
wor  
WRNexo  
Wsck  
wuho  
wun2  
wus  
yellow-b  
yellow-d

yellow-e3  
yellow-f  
yemalpha  
yin  
Yp3  
zetaCOP  
zormin  
Zw  
zwilch
